# Supplementary material
Source: PubMed Central journal article supplement (PMC4994016)

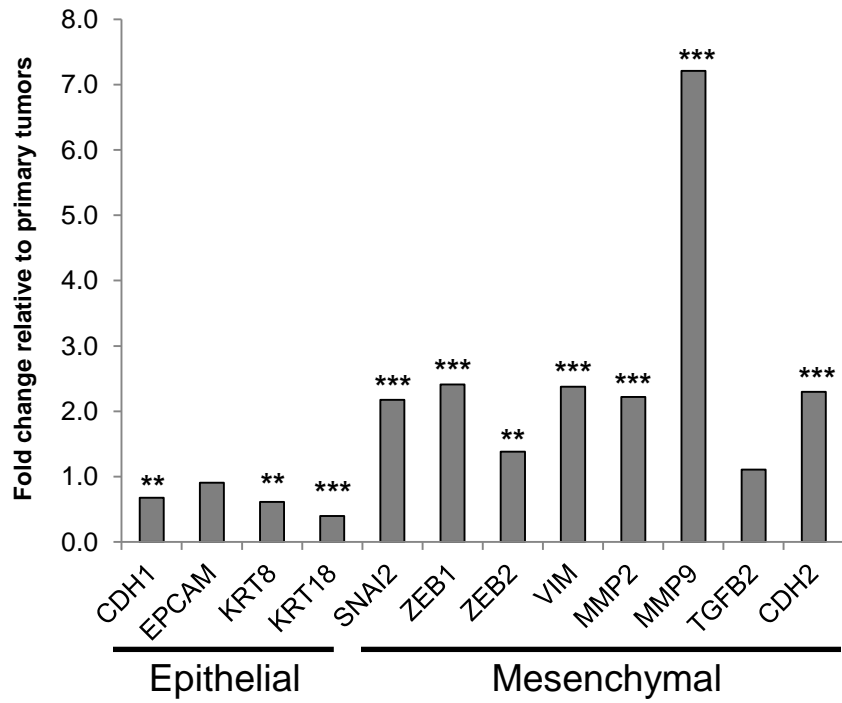

Supplement: onc2015497x1.pdf [file onc2015497x1.pdf]
