# Supplementary material
Source: PubMed Central journal article supplement (PMC4994016)

**A**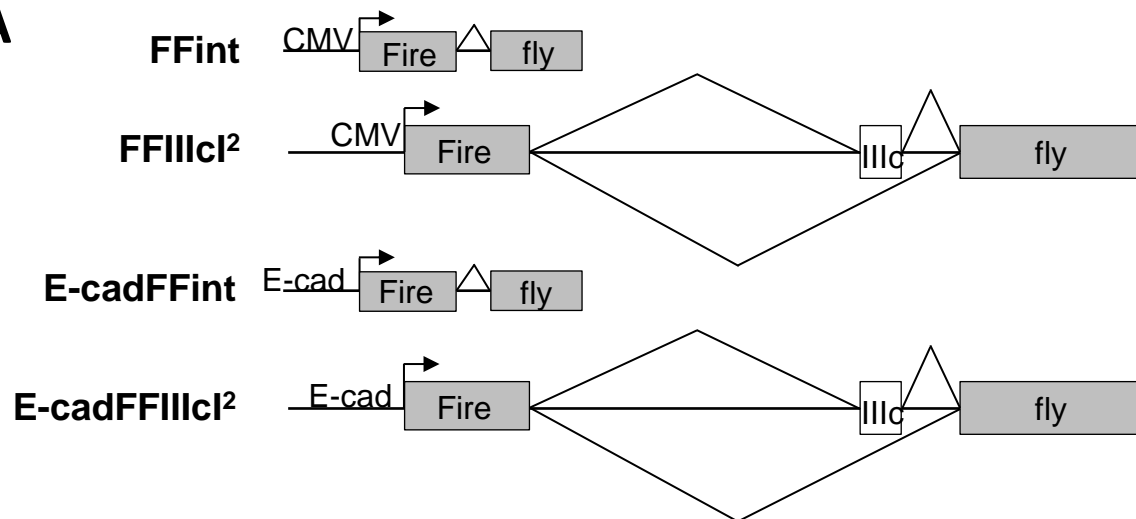**B**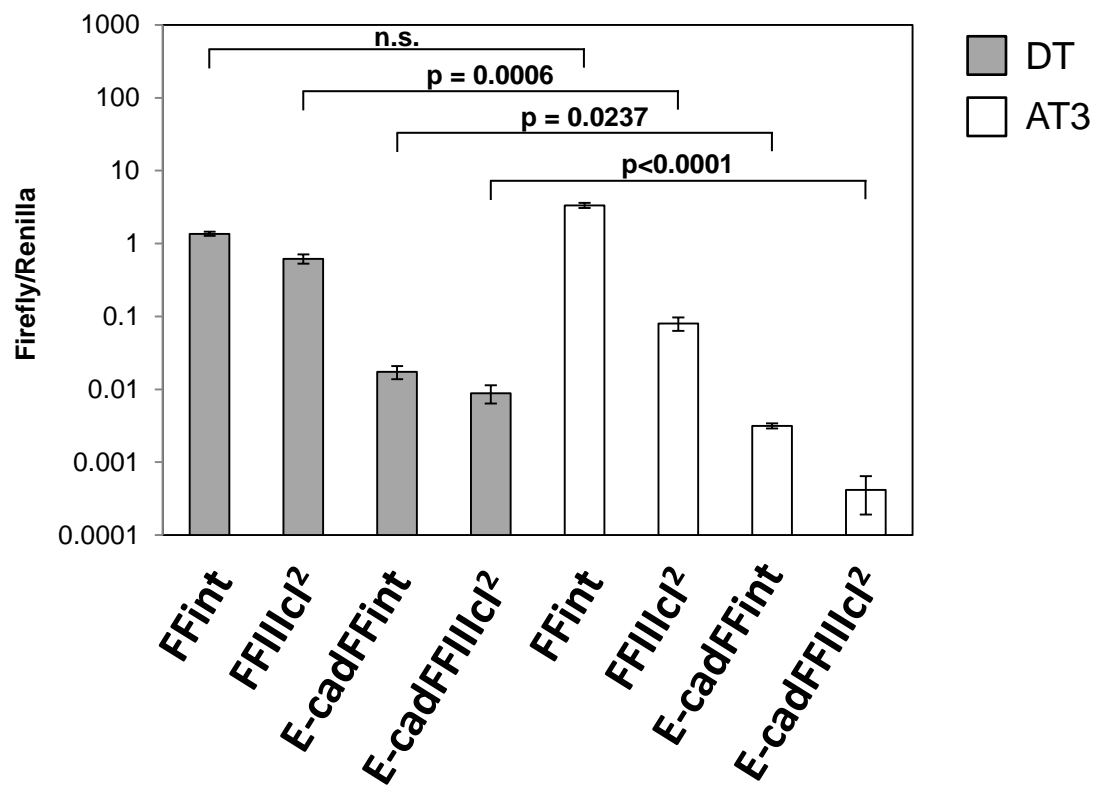

Supplement: onc2015497x2.pdf [file onc2015497x2.pdf]
