# Supplementary material
Source: PubMed Central journal article supplement (PMC4994016)

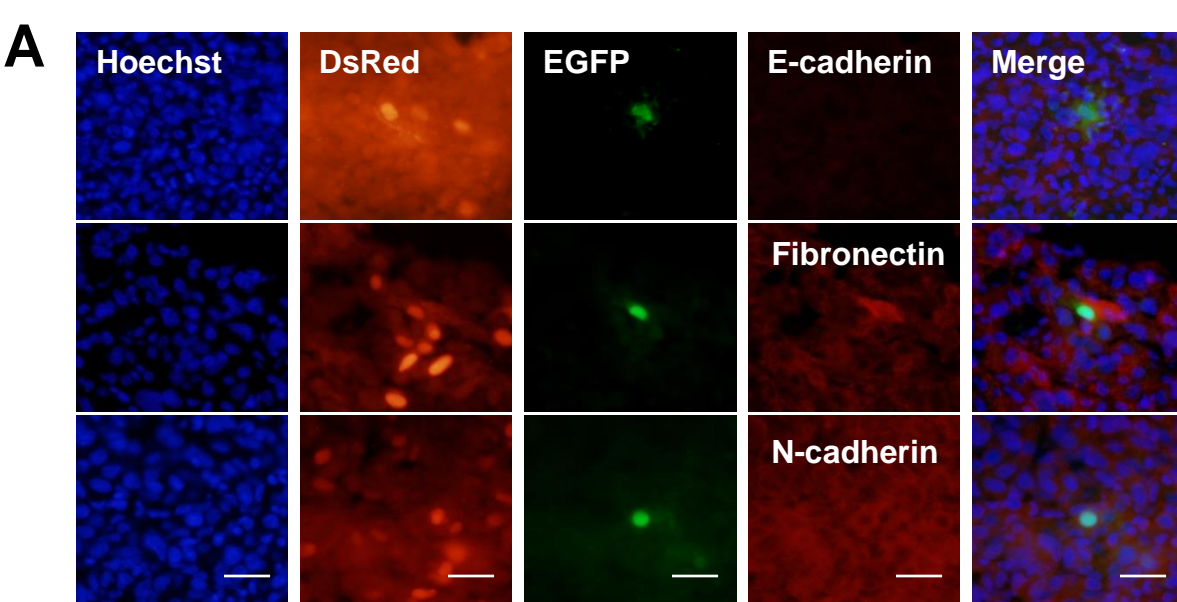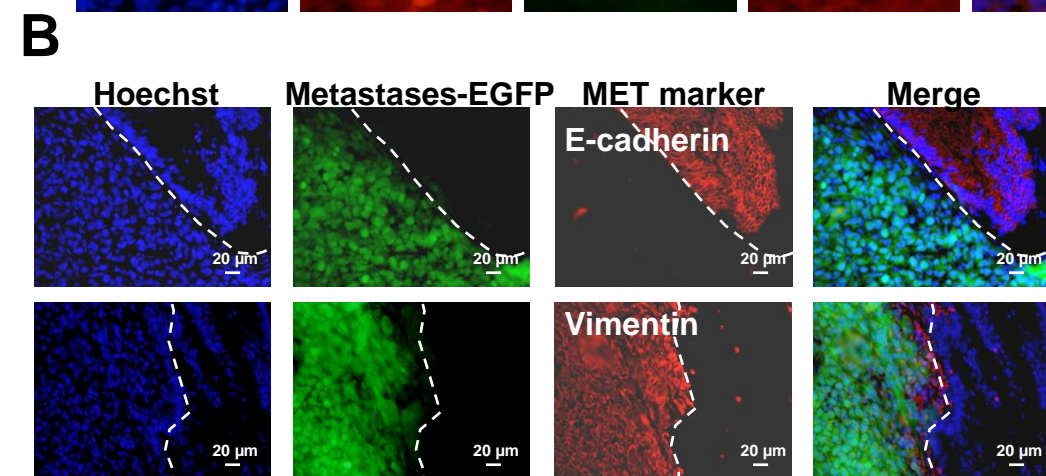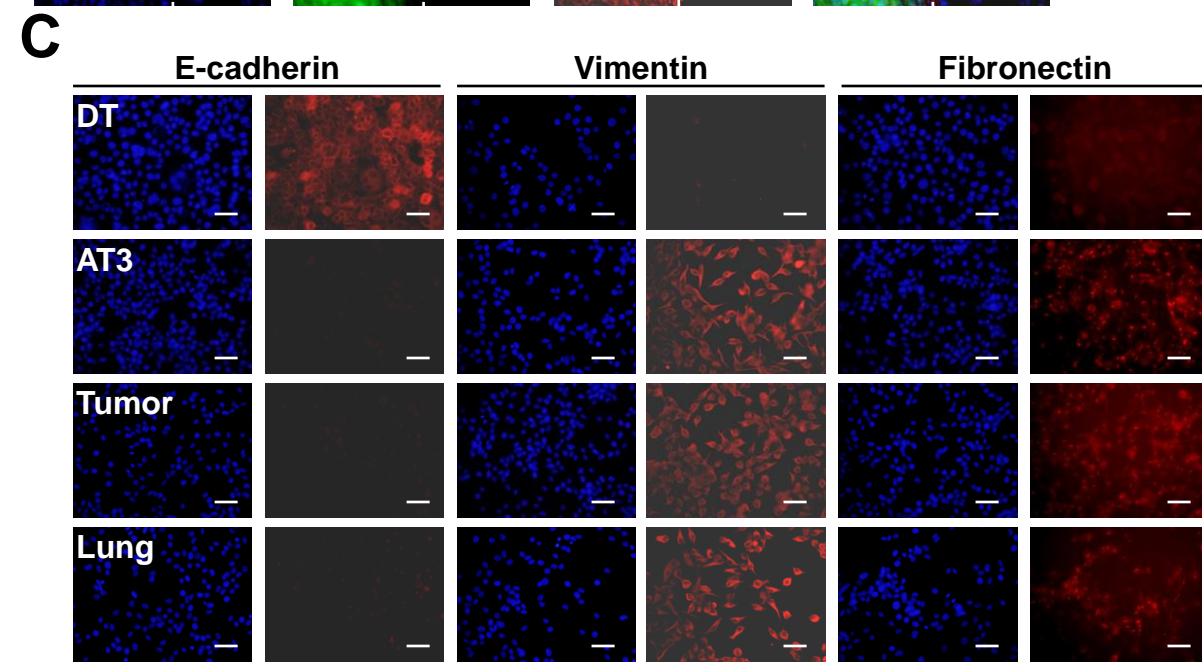

Supplement: onc2015497x4.pdf [file onc2015497x4.pdf]
