# Supplementary material
Source: PubMed Central journal article supplement (PMC4994016)

**A****Human carcinosarcomas**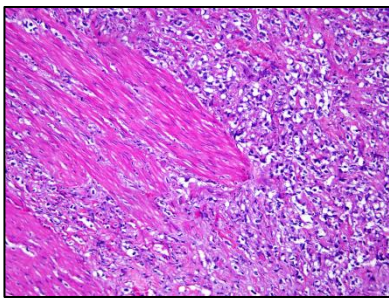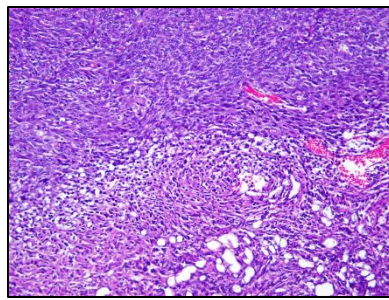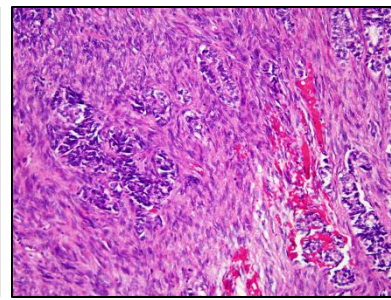**AT3 primary tumor**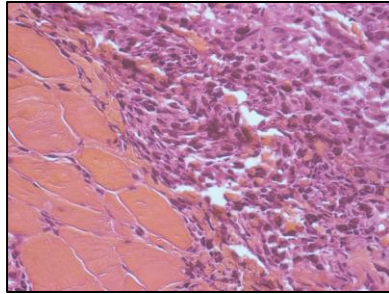**B****Human carcinosarcoma****Cytokeratin**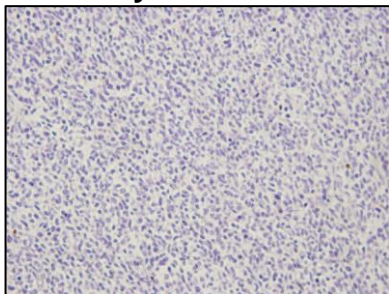**Vimentin**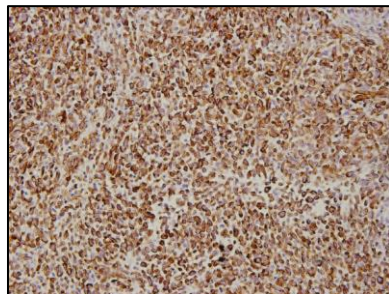**AT3 primary tumor**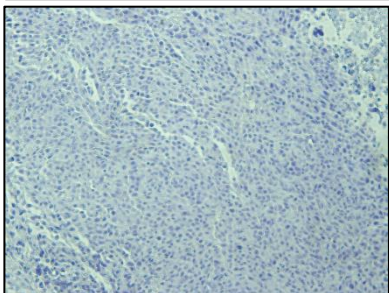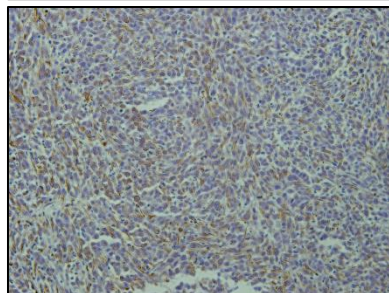

Supplement: onc2015497x6.pdf [file onc2015497x6.pdf]
